# Supplementary material
Source: Elsevier journal article supplement (https://www.sciencedirect.com/science/article/pii/S0021755717301353)
Supplement: mmc1 [file S0021755717301353:mmc1.pdf]

## ESCORE DE SINTOMAS DA ESOFAGITE EOSINOFÍLICA PEDIÁTRICA (EEo)

### RELATÓRIO PARA OS PAIS DE CRIANÇAS E ADOLESCENTES (2-18 ANOS)

**Conte-nos sobre quais foram as dificuldades do(a) seu(sua) filho(a) com a Esofagite no último MÊS.**

Não há respostas certas ou erradas. Por favor, circule o número que melhor representa sua escolha.

Por favor, responda à pergunta na seção de **Frequência** e, depois, à pergunta relacionada na seção **Gravidade**

| FREQUÊNCIA                                        |                                          |                                            |                                      |                                             | GRAVIDADE                                                                           |                                                                                     |                                                                                     |                                                                                     |                                                                                     |
|---------------------------------------------------|------------------------------------------|--------------------------------------------|--------------------------------------|---------------------------------------------|-------------------------------------------------------------------------------------|-------------------------------------------------------------------------------------|-------------------------------------------------------------------------------------|-------------------------------------------------------------------------------------|-------------------------------------------------------------------------------------|
| Nunca                                             | Raramente<br>(uma ou mais vezes por mês) | Às vezes<br>(uma ou mais vezes por semana) | Frequente-mente<br>(Uma vez por dia) | Quase sempre<br>(duas ou mais vezes ao dia) | Nada mal                                                                            | Um pouco mal                                                                        | Mais ou menos mal                                                                   | Mal                                                                                 | Muito mal                                                                           |
|                                                   |                                          |                                            |                                      |                                             |  |  |  |  |  |
| Com que frequência seu(sua) filho(a) fica doente? |                                          |                                            |                                      |                                             | Como ele(a) se sente quando fica doente?                                            |                                                                                     |                                                                                     |                                                                                     |                                                                                     |
| 0                                                 | 1                                        | 2                                          | 3                                    | 4                                           | 0                                                                                   | 1                                                                                   | 2                                                                                   | 3                                                                                   | 4                                                                                   |

#### Para uso exclusivo dos pesquisadores

| Número de identificação da pesquisa:                                                       | Numero de identificação do sujeito de pesquisa: | Date do preenchimento:                                                                          | Dia | Mês | Ano |   |   |   |   |
|--------------------------------------------------------------------------------------------|-------------------------------------------------|-------------------------------------------------------------------------------------------------|-----|-----|-----|---|---|---|---|
| 1. Com que frequência seu(sua) filho(a) sente dor no peito?                                |                                                 | 2. Como seu(sua) filho(a) se sente quando está com dor no peito?                                |     |     |     |   |   |   |   |
| 0                                                                                          | 1                                               | 2                                                                                               | 3   | 4   | 0   | 1 | 2 | 3 | 4 |
| 3. Com que frequência seu(sua) filho(a) sente azia (queimação no peito, boca ou garganta)? |                                                 | 4. Como seu(sua) filho(a) se sente quando está com azia (queimação no peito, boca ou garganta)? |     |     |     |   |   |   |   |
| 0                                                                                          | 1                                               | 2                                                                                               | 3   | 4   | 0   | 1 | 2 | 3 | 4 |
| 5. Com que frequência seu(sua) filho(a) tem dor de estômago ou de barriga?                 |                                                 | 6. Como seu(sua) filho(a) se sente quando tem dor de estômago ou de barriga?                    |     |     |     |   |   |   |   |
| 0                                                                                          | 1                                               | 2                                                                                               | 3   | 4   | 0   | 1 | 2 | 3 | 4 |

### Conte-nos sobre quais foram as dificuldades do(a) seu(sua) filho(a) com a Esofagite no último MÊS

| FREQUÊNCIA |                                                |                                                  |                                             |                                                      |
|------------|------------------------------------------------|--------------------------------------------------|---------------------------------------------|------------------------------------------------------|
| Nunca      | Raramente<br>(uma ou mais<br>vezes por<br>mês) | As vezes<br>(uma ou<br>mais vezes<br>por semana) | Frequenteme<br>n-te<br>(Uma vez por<br>dia) | Quase<br>sempre<br>(duas ou<br>mais vezes<br>ao dia) |

7. Com que frequência seu(sua) filho(a) tem dificuldade para engolir?

|   |   |   |   |   |
|---|---|---|---|---|
| 0 | 1 | 2 | 3 | 4 |
|---|---|---|---|---|

9. Com que frequência seu(sua) filho(a) sente como se a comida ficasse presa em sua garganta ou peito?

|   |   |   |   |   |
|---|---|---|---|---|
| 0 | 1 | 2 | 3 | 4 |
|---|---|---|---|---|

11. Com que frequência seu(sua) filho(a) precisa beber algo para ajudar a engolir a comida?

|   |   |   |   |   |
|---|---|---|---|---|
| 0 | 1 | 2 | 3 | 4 |
|---|---|---|---|---|

13. Com que frequência seu(sua) filho(a) vomita?

|   |   |   |   |   |
|---|---|---|---|---|
| 0 | 1 | 2 | 3 | 4 |
|---|---|---|---|---|

15. Com que frequência seu(sua) filho(a) sente enjoos (sente que vai vomitar, mas não vomita)?

|   |   |   |   |   |
|---|---|---|---|---|
| 0 | 1 | 2 | 3 | 4 |
|---|---|---|---|---|

17. Com que frequência a comida volta pela garganta do(a) seu(sua) filho(a) quando ele(a) come?

|   |   |   |   |   |
|---|---|---|---|---|
| 0 | 1 | 2 | 3 | 4 |
|---|---|---|---|---|

19. Com que frequência seu(sua) filho(a) come menos do que as outras pessoas?

|   |   |   |   |   |
|---|---|---|---|---|
| 0 | 1 | 2 | 3 | 4 |
|---|---|---|---|---|

20. Com que frequência seu(sua) filho(a) precisa de mais tempo para comer do que as outras pessoas?

|   |   |   |   |   |
|---|---|---|---|---|
| 0 | 1 | 2 | 3 | 4 |
|---|---|---|---|---|

| GRAVIDADE                                                                           |                                                                                     |                                                                                     |                                                                                     |                                                                                     |
|-------------------------------------------------------------------------------------|-------------------------------------------------------------------------------------|-------------------------------------------------------------------------------------|-------------------------------------------------------------------------------------|-------------------------------------------------------------------------------------|
| Nada mal                                                                            | Um pouco<br>mal                                                                     | Mais ou<br>menos mal                                                                | Mal                                                                                 | Muito mal                                                                           |
|  |  |  |  |  |

8. Como seu(sua) filho(a) se sente quando está com dificuldade para engolir?

|   |   |   |   |   |
|---|---|---|---|---|
| 0 | 1 | 2 | 3 | 4 |
|---|---|---|---|---|

10. Como seu(sua) filho(a) se sente quando a comida fica presa em sua garganta ou peito?

|   |   |   |   |   |
|---|---|---|---|---|
| 0 | 1 | 2 | 3 | 4 |
|---|---|---|---|---|

12. Como seu(sua) filho(a) se sente se não bebe algo para ajudar a engolir a comida?

|   |   |   |   |   |
|---|---|---|---|---|
| 0 | 1 | 2 | 3 | 4 |
|---|---|---|---|---|

14. Como seu(sua) filho(a) se sente quando vomita?

|   |   |   |   |   |
|---|---|---|---|---|
| 0 | 1 | 2 | 3 | 4 |
|---|---|---|---|---|

16. Como seu(sua) filho(a) se sente quando está com enjoos (sentindo que vai vomitar, mas não vomita)?

|   |   |   |   |   |
|---|---|---|---|---|
| 0 | 1 | 2 | 3 | 4 |
|---|---|---|---|---|

18. Como seu(sua) filho(a) se sente quando a comida volta pela garganta?

|   |   |   |   |   |
|---|---|---|---|---|
| 0 | 1 | 2 | 3 | 4 |
|---|---|---|---|---|

Muito obrigado(a) por participar!
