# Supplementary material
Source: Elsevier journal article supplement (https://www.sciencedirect.com/science/article/pii/S0021755717301353)
Supplement: mmc2 [file S0021755717301353:mmc2.pdf]

## ESCORE DE SINTOMAS DA ESOFAGITE EOSINOFÍLICA PEDIÁTRICA (EEo)

### RELATÓRIO PARA CRIANÇAS E ADOLESCENTES (8-18 ANOS)

**Conte-nos sobre quais foram suas dificuldades com a Esofagite no último MÊS.**

Não há respostas certas ou erradas. Por favor, circule o número que melhor representa sua escolha.

Por favor, responda à pergunta na seção de **Frequência** e, depois, à pergunta relacionada na seção **Gravidade**

| FREQUÊNCIA                           |                                          |                                            |                                         |                                                | GRAVIDADE                                                                           |                                                                                     |                                                                                     |                                                                                     |                                                                                     |
|--------------------------------------|------------------------------------------|--------------------------------------------|-----------------------------------------|------------------------------------------------|-------------------------------------------------------------------------------------|-------------------------------------------------------------------------------------|-------------------------------------------------------------------------------------|-------------------------------------------------------------------------------------|-------------------------------------------------------------------------------------|
| Nunca                                | Raramente<br>(uma ou mais vezes por mês) | Às vezes<br>(uma ou mais vezes por semana) | Frequente<br>mente<br>(Uma vez por dia) | Quase<br>sempre<br>(duas ou mais vezes ao dia) | Nada mal                                                                            | Um pouco<br>mal                                                                     | Mais ou<br>menos mal                                                                | Mal                                                                                 | Muito mal                                                                           |
|                                      |                                          |                                            |                                         |                                                |  |  |  |  |  |
| Com que frequência você fica doente? |                                          |                                            |                                         |                                                | Como você se sente quando fica doente?                                              |                                                                                     |                                                                                     |                                                                                     |                                                                                     |
| 0                                    | 1                                        | 2                                          | 3                                       | 4                                              | 0                                                                                   | 1                                                                                   | 2                                                                                   | 3                                                                                   | 4                                                                                   |

#### Para uso exclusivo dos pesquisadores

|                                      |                                                 |                        |     |     |     |
|--------------------------------------|-------------------------------------------------|------------------------|-----|-----|-----|
| Número de identificação da pesquisa: | Numero de identificação do sujeito de pesquisa: | Date do preenchimento: |     |     |     |
|                                      |                                                 |                        | Dia | Mês | Ano |

1. Com que frequência você sente dor no peito?

|   |   |   |   |   |
|---|---|---|---|---|
| 0 | 1 | 2 | 3 | 4 |
|---|---|---|---|---|

3. Com que frequência você sente azia (queimação no peito, boca ou garganta)?

|   |   |   |   |   |
|---|---|---|---|---|
| 0 | 1 | 2 | 3 | 4 |
|---|---|---|---|---|

5. Com que frequência você sente dor de estômago ou de barriga?

|   |   |   |   |   |
|---|---|---|---|---|
| 0 | 1 | 2 | 3 | 4 |
|---|---|---|---|---|

2. Como você se sente quando está com dor no peito?

|   |   |   |   |   |
|---|---|---|---|---|
| 0 | 1 | 2 | 3 | 4 |
|---|---|---|---|---|

4. Como você se sente quando está com azia (queimação no peito, boca ou garganta)?

|   |   |   |   |   |
|---|---|---|---|---|
| 0 | 1 | 2 | 3 | 4 |
|---|---|---|---|---|

6. Como você se sente quando está com dor de estômago ou de barriga?

|   |   |   |   |   |
|---|---|---|---|---|
| 0 | 1 | 2 | 3 | 4 |
|---|---|---|---|---|

## Conte-nos sobre quais foram suas dificuldades com a Esofagite no último **MÊS**

| FREQUÊNCIA |                                          |                                            |                                     |                                             |
|------------|------------------------------------------|--------------------------------------------|-------------------------------------|---------------------------------------------|
| Nunca      | Raramente<br>(uma ou mais vezes por mês) | As vezes<br>(uma ou mais vezes por semana) | Frequentemente<br>(Uma vez por dia) | Quase sempre<br>(duas ou mais vezes ao dia) |

7. Com que frequência você tem dificuldade para engolir?

|   |   |   |   |   |
|---|---|---|---|---|
| 0 | 1 | 2 | 3 | 4 |
|---|---|---|---|---|

9. Com que frequência você se sente como se a comida ficasse presa em sua garganta ou peito?

|   |   |   |   |   |
|---|---|---|---|---|
| 0 | 1 | 2 | 3 | 4 |
|---|---|---|---|---|

11. Com que frequência você precisa beber algo para ajudar a engolir a comida?

|   |   |   |   |   |
|---|---|---|---|---|
| 0 | 1 | 2 | 3 | 4 |
|---|---|---|---|---|

13. Com que frequência você vomita?

|   |   |   |   |   |
|---|---|---|---|---|
| 0 | 1 | 2 | 3 | 4 |
|---|---|---|---|---|

15. Com que frequência você sente enjoos (sente que vai vomitar, mas não vomita)?

|   |   |   |   |   |
|---|---|---|---|---|
| 0 | 1 | 2 | 3 | 4 |
|---|---|---|---|---|

17. Com que frequência a comida volta pela sua garganta quando você está comendo?

|   |   |   |   |   |
|---|---|---|---|---|
| 0 | 1 | 2 | 3 | 4 |
|---|---|---|---|---|

19. Com que frequência você come menos do que as outras pessoas?

|   |   |   |   |   |
|---|---|---|---|---|
| 0 | 1 | 2 | 3 | 4 |
|---|---|---|---|---|

20. Com que frequência você precisa de mais tempo para comer do que as outras pessoas?

|   |   |   |   |   |
|---|---|---|---|---|
| 0 | 1 | 2 | 3 | 4 |
|---|---|---|---|---|

| GRAVIDADE                                                                           |                                                                                     |                                                                                     |                                                                                     |                                                                                     |
|-------------------------------------------------------------------------------------|-------------------------------------------------------------------------------------|-------------------------------------------------------------------------------------|-------------------------------------------------------------------------------------|-------------------------------------------------------------------------------------|
| Nada mal                                                                            | Um pouco mal                                                                        | Mais ou menos mal                                                                   | Mal                                                                                 | Muito mal                                                                           |
|  |  |  |  |  |

8. Como você se sente quando está com dificuldade para engolir?

|   |   |   |   |   |
|---|---|---|---|---|
| 0 | 1 | 2 | 3 | 4 |
|---|---|---|---|---|

10. Como você se sente quando a comida fica presa em sua garganta ou peito?

|   |   |   |   |   |
|---|---|---|---|---|
| 0 | 1 | 2 | 3 | 4 |
|---|---|---|---|---|

12. Como você se sente se não bebe algo para ajudar a engolir a comida?

|   |   |   |   |   |
|---|---|---|---|---|
| 0 | 1 | 2 | 3 | 4 |
|---|---|---|---|---|

14. Como você se sente quando vomita?

|   |   |   |   |   |
|---|---|---|---|---|
| 0 | 1 | 2 | 3 | 4 |
|---|---|---|---|---|

16. Como você se sente quando está com enjoos (sentindo que vai vomitar, mas não vomita)?

|   |   |   |   |   |
|---|---|---|---|---|
| 0 | 1 | 2 | 3 | 4 |
|---|---|---|---|---|

18. Como você se sente quando a comida volta pela garganta quando você está comendo?

|   |   |   |   |   |
|---|---|---|---|---|
| 0 | 1 | 2 | 3 | 4 |
|---|---|---|---|---|

Muito obrigado(a) por participar!
